# Supplementary material for: Prospective Longitudinal Study of Putative Agents Involved in Complex Gill Disorder in Atlantic salmon (Salmo salar)
Source: MDPI journal article supplement (doi:10.3390/pathogens11080878), 2022-08-03
Supplement: s1 [file s1]

**Supplementary Table S1.** Average and standard deviation (sd) of the environmental parameters measured 14 days before the sampling point.

| Week | Oxygen Saturation (%) |      |         |     | Salinity (ppt) |      |         |     | Water Temperature (°C) |     |         |     |
|------|-----------------------|------|---------|-----|----------------|------|---------|-----|------------------------|-----|---------|-----|
|      | Farm A                |      | Farm B  |     | Farm A         |      | Farm B  |     | Farm A                 |     | Farm B  |     |
|      | Average               | sd   | Average | sd  | Average        | sd   | Average | sd  | Average                | sd  | Average | sd  |
| 6    | 95.3                  | 2.3  | -       | -   | 30.6           | 1.9  | -       | -   | 8.3                    | 0.4 | -       | -   |
| 10   | 103.4                 | 6.4  | 97.4    | 4.4 | 30.9           | 3.1  | 34.0    | 0.0 | 7.6                    | 0.4 | 7.4     | 0.2 |
| 14   | 103.8                 | 3.6  | 98.2    | 4.9 | 32.9           | 1.4  | 34.0    | 0.0 | 8.2                    | 0.3 | 7.9     | 0.3 |
| 19   | 104.1                 | 1.3  | 113.4   | 6.9 | 32.3           | 2.2  | 34.0    | 0.0 | 10.7                   | 0.5 | 12.1    | 0.9 |
| 23   | 97.1                  | 7.6  | 114.1   | 4.1 | 34.6           | 0.9  | 34.0    | 0.0 | 11.3                   | 0.3 | 10.8    | 0.5 |
| 28   | 90.4                  | 6.0  | 107.1   | 5.7 | 32.4           | 1.2  | 34.0    | 0.0 | 13.0                   | 0.4 | 12.8    | 0.4 |
| 30   | 93.5                  | 5.0  | 96.9    | 6.3 | 28.3           | 3.5  | 34.0    | 0.0 | 13.3                   | 0.2 | 12.8    | 0.8 |
| 32   | 88.1                  | 8.0  | 96.4    | 6.2 | 30.1           | 3.0  | 34.0    | 0.0 | 13.6                   | 0.2 | 12.8    | 0.4 |
| 34   | 89.3                  | 4.5  | 94.0    | 5.2 | 30.9           | 3.0  | 34.0    | 0.0 | 13.7                   | 0.2 | 12.9    | 0.3 |
| 36   | 83.0                  | 3.3  | 96.7    | 5.3 | 31.6           | 3.4  | 34.0    | 0.0 | 13.2                   | 0.4 | 12.4    | 0.2 |
| 38   | 80.2                  | 2.6  | 89.0    | 3.7 | 27.2           | 2.0  | 34.0    | 0.0 | 12.3                   | 0.4 | 12.3    | 0.3 |
| 40   | 85.0                  | 3.7  | 88.5    | 3.6 | 29.1           | 2.6  | 34.0    | 0.0 | 12.0                   | 0.5 | 11.8    | 0.2 |
| 43   | 81.9                  | 2.5  | 91.3    | 3.2 | 31.1           | 1.9  | 34.0    | 0.0 | 11.0                   | 1.0 | 10.9    | 0.5 |
| 45   | 83.1                  | 2.1  | 89.8    | 5.4 | 32.0           | 1.2  | 34.0    | 0.0 | 10.9                   | 0.4 | 10.3    | 0.3 |
| 47   | 86.9                  | 3.5  | 88.7    | 4.4 | 31.3           | 1.3  | 34.0    | 0.0 | 10.7                   | 0.6 | 10.5    | 0.6 |
| 49   | 88.5                  | 1.8  | 93.1    | 4.2 | 30.6           | 2.6  | 34.0    | 0.0 | 9.3                    | 0.6 | 9.7     | 0.4 |
| 52   | 86.2                  | 1.5  | 90.4    | 1.9 | 31.2           | 1.1  | 34.0    | 0.0 | 9.0                    | 0.4 | 9.0     | 0.2 |
| 54   | 82.4                  | 12.5 | 90.3    | 2.8 | 32.4           | 1.7  | 34.0    | 0.0 | 9.0                    | 0.4 | 9.0     | 0.1 |
| 57   | 90.1                  | 0.7  | 92.3    | 3.3 | 33.4           | 14.6 | 34.0    | 0.0 | 8.2                    | 0.3 | 7.9     | 0.3 |

**Supplementary Table S2.** Comparison of the GAMs for the prediction of Ct value for different pathogens (*D. lepeophtherii*, *N. perurans*, SGPV and *Ca. B. cysticola*) across weeks and between farms. Note that Model 3 always gave the lowest AIC results.

| Pathogen                | AIC value of the model |          |          |          |
|-------------------------|------------------------|----------|----------|----------|
|                         | Model 0                | Model 1  | Model 2  | Model 3  |
| <i>D. lepeophtherii</i> | 1470.037               | 1286.769 | 1166.898 | 1120.162 |
| <i>N. perurans</i>      | 1463.528               | 1369.372 | 1464.715 | 1221.686 |
| SGPV                    | 1113.753               | 1067.951 | 1039.969 | 1038.828 |
| <i>Ca. B. cysticola</i> | 1189.390               | 1109.727 | 1103.921 | 1101.267 |

**Supplementary Table S3.** Criteria for the histological gill scoring system used in this study. Slightly modified from Mitchell et al. (2012).

| Score                       | Lamellar Epithelium Hyperplasia                                                                                                                                                                                                                                                                                                                                                                                                                                                                                                                                                                                                                                                                                                          | Lamellar Fusion                                                                                  | Cellular Death                                                                                                       | Circulatory Disturbances                                                | Inflammation                                                              |
|-----------------------------|------------------------------------------------------------------------------------------------------------------------------------------------------------------------------------------------------------------------------------------------------------------------------------------------------------------------------------------------------------------------------------------------------------------------------------------------------------------------------------------------------------------------------------------------------------------------------------------------------------------------------------------------------------------------------------------------------------------------------------------|--------------------------------------------------------------------------------------------------|----------------------------------------------------------------------------------------------------------------------|-------------------------------------------------------------------------|---------------------------------------------------------------------------|
| None (0)                    | None or very minor                                                                                                                                                                                                                                                                                                                                                                                                                                                                                                                                                                                                                                                                                                                       | None or very minor                                                                               | None or very minor                                                                                                   | None or very minor                                                      | None or very minor                                                        |
| Mild (1)                    | Mild increase in lamellar epithelial cell (<10% of gill tissue affected)                                                                                                                                                                                                                                                                                                                                                                                                                                                                                                                                                                                                                                                                 | Occasional focal fusion of filaments (<10% of gill tissue affected)                              | Scattered, occasional, degenerating necrotic or apoptotic cells and/or cell sloughing (<10% of gill tissue affected) | Scattered, occasional vascular changes (<10% of gill tissue affected)   | Scattered, occasional inflammatory cells (<10% of gill tissue affected)   |
| Moderate (2)                | Moderate multifocal or widespread increase in lamellar epithelial cells, affecting 10–50% of the tissue                                                                                                                                                                                                                                                                                                                                                                                                                                                                                                                                                                                                                                  | Multifocal areas of fusion, affecting 10–50% of gill tissue interspersed with normal gill tissue | Multifocal, degenerating necrotic or apoptotic cells and/or cell sloughing affecting 10–50% of the tissue            | Vascular changes in multifocal areas, affecting 10–50% of the tissue    | Inflammatory cells in multifocal areas, affecting 10–50% of the tissue    |
| Severe (3)                  | Extensive multifocal or widespread increase in lamellar epithelial cells, affecting >50% of the tissue                                                                                                                                                                                                                                                                                                                                                                                                                                                                                                                                                                                                                                   | Extensive fusion and loss of normal architecture, affecting >50% of the tissue                   | Extensive, degenerating necrotic or apoptotic cells and/or cell sloughing affecting >50% of the tissue               | Multifocal to widespread vascular changes, affecting >50% of the tissue | Multifocal to widespread inflammatory cells, affecting >50% of the tissue |
| Absence (0) or presence (1) | <ul style="list-style-type: none"> <li>• Lamellar tissue disruption (disruption of a group of lamellae, associated with haemorrhages and cell death)</li> <li>• Lamellar oedema (<math>\geq 10\%</math> of gill tissue affected)</li> <li>• Eosinophilic Granular Cells (increase of EGCs numbers within the filaments)</li> <li>• Bacteria- Epitheliocysts (variable sized basophilic inclusion bodies found mainly in the branchial epithelium)</li> <li>• Bacteria- <i>Tenacibaculum</i> spp.</li> <li>• Protists - <i>Neoparamoeba</i> spp.</li> <li>• Protists - <i>Ichthyobodo</i> spp. (Costia)</li> <li>• Protists - <i>Trichodina</i> spp.</li> <li>• Unidentified metazoan organisms (i.e. filamental metacercaria)</li> </ul> |                                                                                                  |                                                                                                                      |                                                                         |                                                                           |
